# Supplementary material
Source: Elsevier journal article supplement (https://www.sciencedirect.com/science/article/pii/S0210570522001522)
Supplement: mmc1 [file S0210570522001522:mmc1.pdf]

Annex 1: Rawl’s questionnaire

**FOBT BENEFITS (Cronbach’s Alpha = 0.76)**

Now there are some questions about the stool blood test, which is sometimes called a Hemoccult or fecal occult blood test. This is something you do at home to examine your stool for hidden blood. The test requires you to place a small sample of your stool or bowel movement on a special card that comes in a kit. This card is then sent to your doctor’s office or to a lab for testing.

I’m going to read some statements about doing regular stool blood tests. Please tell me how strongly you agree or disagree with each statement.

Instructions to the Interviewer: Ask Do you agree or disagree? after each statement.

If AGREE, follow up with: do you agree or strongly agree?

If DISAGREE, follow up with: do you disagree or strongly disagree?

| Doing regular stool blood tests ... |                                                         | Strongly Disagree | Disagree | Agree | Strongly Agree | Don’t know | Refused |
|-------------------------------------|---------------------------------------------------------|-------------------|----------|-------|----------------|------------|---------|
| 1                                   | will help you find colon cancer early                   | 1                 | 2        | 3     | 4              | 8          | 9       |
| 2                                   | will help lower your chances of dying from colon cancer | 1                 | 2        | 3     | 4              | 8          | 9       |
| 3                                   | will help you not worry as much about colon cancer      | 1                 | 2        | 3     | 4              | 8          | 9       |

FOBT BARRIERS (Cronbach's alpha = 0.82)

I'm going to read a list of reasons some people give for putting off doing a stool blood test. Please tell me how strongly you AGREE or DISAGREE with each reason.

Instructions to the Interviewer: Ask Do you agree or disagree? after each statement.

If AGREE, follow up with: Do you agree or strongly agree?

If DISAGREE, follow up with: Do you disagree or strongly disagree?

| You might put off doing a stool blood test because... |                                               | Strongly Disagree | Disagree | Agree | Strongly Agree | Don't know | Refused |
|-------------------------------------------------------|-----------------------------------------------|-------------------|----------|-------|----------------|------------|---------|
| 1                                                     | You worry about finding something wrong       | 1                 | 2        | 3     | 4              | 8          | 9       |
| 2                                                     | It is embarrassing                            | 1                 | 2        | 3     | 4              | 8          | 9       |
| 3                                                     | You don't have the time                       | 1                 | 2        | 3     | 4              | 8          | 9       |
| 4                                                     | You don't know how to do one                  | 1                 | 2        | 3     | 4              | 8          | 9       |
| 5                                                     | Collecting a stool sample is unpleasant       | 1                 | 2        | 3     | 4              | 8          | 9       |
| 6                                                     | The cost would be a problem                   | 1                 | 2        | 3     | 4              | 8          | 9       |
| 7                                                     | You don't have any bowel problems or symptoms | 1                 | 2        | 3     | 4              | 8          | 9       |
| 8                                                     | You don't have the privacy to do one at home  | 1                 | 2        | 3     | 4              | 8          | 9       |
| 9                                                     | It is not that important right now            | 1                 | 2        | 3     | 4              | 8          | 9       |
